# Supplementary material for: Predicting response of severe aplastic anemia to immunosuppression combined with eltrombopag
Source: PubMed Central journal article supplement — Haematologica. 2021 Apr 29;107(1):126–33. doi: 10.3324/haematol.2021.278413 (PMC8719075; doi:10.3324/haematol.2021.278413), 2021-04-29
Supplement: 2021_278413_ZAIMOKU_SUPPL.pdf [file 2021_278413_ZAIMOKU_SUPPL.pdf]

## Predicting response of severe aplastic anemia to immunosuppression combined with eltrombopag

Yoshitaka Zaimoku,<sup>1</sup> Bhavisha A. Patel,<sup>1</sup> Ruba Shalhoub,<sup>2</sup> Emma M. Groarke,<sup>1</sup> Xingmin Feng,<sup>1</sup> Colin O. Wu<sup>2</sup> and Neal S. Young<sup>1</sup>

<sup>1</sup>Hematology Branch, National Heart, Lung, and Blood Institute, National Institutes of Health and <sup>2</sup>Office of Biostatistics Research, National Heart, Lung, and Blood Institute, National Institutes of Health, Bethesda, MD, USA

©2022 Ferrata Storti Foundation. This is an open-access paper. doi:10.3324/haematol.2021.278413

Received: January 24, 2021.

Accepted: April 2, 2021.

Pre-published: April 29, 2021.

Correspondence: YOSHITAKA ZAIMOKU - zaimokuyoshitaka@gmail.com

---

## Supplementary information

### Predicting response of severe aplastic anemia to immunosuppression combined with eltrombopag

Yoshitaka Zaimoku,<sup>1</sup> Bhavisha A. Patel,<sup>1</sup> Ruba Shalhoub,<sup>2</sup> Emma M. Groarke,<sup>1</sup>  
Xingmin Feng,<sup>1</sup> Colin O. Wu<sup>2</sup> and Neal S. Young<sup>1</sup>

<sup>1</sup>*Hematology Branch, National Heart, Lung, and Blood Institute, National Institutes of Health;*

<sup>2</sup>*Office of Biostatistics Research, National Heart, Lung, and Blood Institute, National Institutes of Health,  
Bethesda, MD, USA.*

#### Supplementary methods

##### *Treatment*

Horse ATG (ATGAM, Pfizer) was administered at a dose of 40 mg/kg of body weight per day for 4 days; cyclosporine was administered every 12 hours from day 1<sup>1-3</sup> or from day 14,<sup>4</sup> and was continued at least until 6 months with the dose adjusted to maintain trough blood levels of 200 to 400 ng/mL; mycophenolate mofetil was administered on day 1 of ATG at 600 mg/m<sup>2</sup> twice daily for patients aged <12 years and at 1 g twice daily for those ≥12 years, for 18 months; sirolimus at a dose of 2 mg/day in adults and 1 mg/m<sup>2</sup>/day in children (<40 kg) was given on day 1 of ATG and continued for 6 months, with dose adjustment to maintain sirolimus levels between 5–15 ng/mL; EPAG was administered at a dose of 150 mg daily (75 mg daily for children aged 6–11 years, and 2.5 mg/kg of body weight per day for those who aged 2–5 years) and the duration varied in three subgroups, from day 14 until 6 months (cohort 1), from day 14 until 3 months (cohort 2) and from day 1 until 6 months (cohort 3 and extension cohort).

Table S1

Table S1. Logistic regression analysis for overall response

|                                   | Univariable logistic regression |            |         | Multivariable logistic regression |           |         |
|-----------------------------------|---------------------------------|------------|---------|-----------------------------------|-----------|---------|
|                                   | Odds ratio                      | 95% CI     | P       | Odds ratio                        | 95% CI    | P       |
| <b>All patients (n = 416)</b>     |                                 |            |         |                                   |           |         |
| Log (Age+1)                       | 0.88                            | 0.65–1.20  | 0.43    |                                   |           |         |
| Log (ARC+1)                       | 2.24                            | 1.76–2.90  | <0.0001 | 2.06                              | 1.60–2.68 | <0.0001 |
| Log (ANC+1)                       | 7.27                            | 2.53–22.2  | 0.0003  | *                                 | *         | *       |
| Log (ALC+1)                       | 3.52                            | 1.65–7.65  | 0.0013  | 2.95                              | 1.33–6.65 | 0.0084  |
| Log (Plt+1)                       | 1.14                            | 0.85–1.55  | 0.38    |                                   |           |         |
| Male sex                          | 0.81                            | 0.53–1.23  | 0.32    |                                   |           |         |
| PNH clone $\geq 1\%$ †            | 1.32                            | 0.84–1.09  | 0.24    |                                   |           |         |
| IST+EPAG group                    | 2.75                            | 1.74–4.42  | <0.0001 | 2.39                              | 1.48–3.94 | 0.0005  |
| <b>IST + EPAG group (n = 176)</b> |                                 |            |         |                                   |           |         |
| Log (Age+1)                       | 1.15                            | 0.64–2.01  | 0.63    |                                   |           |         |
| Log (ARC+1)                       | 2.35                            | 1.41–4.07  | 0.0015  | 2.12                              | 1.15–4.01 | 0.018   |
| Log (ANC+1)                       | 26.9                            | 3.31–307   | 0.0042  | *                                 | *         | *       |
| Log (ALC+1)                       | 3.08                            | 0.80–12.1  | 0.1     | *                                 | *         | *       |
| Log (Plt+1)                       | 1.86                            | 1.07–3.27  | 0.028   | 1.57                              | 0.84–2.96 | 0.154   |
| Log (TPO+1)‡                      | 0.088                           | 0.014–0.50 | 0.0071  | 0.14                              | 0.02–0.87 | 0.039   |
| Male sex                          | 0.83                            | 0.38–1.80  | 0.649   |                                   |           |         |
| PNH clone $\geq 1\%$ †            | 1.19                            | 0.48–3.14  | 0.71    |                                   |           |         |
| <b>IST-only group (n = 240)</b>   |                                 |            |         |                                   |           |         |
| Log (Age+1)                       | 0.74                            | 0.50–1.09  | 0.14    | *                                 | *         | *       |
| Log (ARC+1)                       | 2.06                            | 1.55–2.77  | <0.0001 | 1.99                              | 1.50–2.69 | <0.0001 |
| Log (ANC+1)                       | 5.78                            | 1.59–22.7  | 0.01    | *                                 | *         | *       |
| Log (ALC+1)                       | 4.13                            | 1.59–11.2  | 0.004   | 3.29                              | 1.20–9.31 | 0.022   |
| Log (Plt+1)                       | 1.05                            | 0.72–1.53  | 0.81    |                                   |           |         |
| Male sex                          | 0.89                            | 0.52–1.52  | 0.68    |                                   |           |         |
| PNH clone $\geq 1\%$ †            | 1.4                             | 0.81–2.43  | 0.23    |                                   |           |         |

Abbreviations are explained in Table S1. \*Variable included in initial multivariable logistic model but excluded by backward stepwise procedure in the final model. †PNH clone was not tested in 19 and 4 patients, treated with IST plus EPAG and IST alone, respectively. ‡TPO was studied in 140 patients treated with IST+EPAG.

Table S2

Table S2. Patient age and impact of ALC on IST outcomes

| Author                                      | Year, Publication (Enrollment) | ATG           | Age, years, median (range) | n   | ALC and OR                                                                                                          | ALC and other outcomes                                                                                               |
|---------------------------------------------|--------------------------------|---------------|----------------------------|-----|---------------------------------------------------------------------------------------------------------------------|----------------------------------------------------------------------------------------------------------------------|
| Gu C <i>et al.</i> <sup>5</sup>             | 2019 (2005–2018)               | ATG-F or rATG | 7 (3–14)                   | 94  | Lower ALC in OR vs NR (median, 1.8 vs 2.5 ×10 <sup>9</sup> /L; <i>P</i> =0.24).                                     |                                                                                                                      |
| Yoshida N <i>et al.</i> <sup>6</sup>        | 2011 (1997–2006)               | hATG          | 8 (1–17)                   | 312 | Lower ALC in OR vs NR (median, 1.6 vs 2.0 ×10 <sup>9</sup> /L; <i>P</i> = <b>0.0060</b> ).                          |                                                                                                                      |
| Narita A <i>et al.</i> <sup>7</sup>         | 2015 (2001–2013)               | hATG or rATG  | 9 (0–16)                   | 113 | Lower ALC in OR vs NR (median, 1.5 vs 2.0 ×10 <sup>9</sup> /L; NS).                                                 |                                                                                                                      |
| Sakaguchi H <i>et al.</i> <sup>8</sup>      | 2014 (not shown)               | hATG or rATG  | 10 (1–16)                  | 64  | Lower ALC in OR vs NR (median, 1.8 vs 2.0 ×10 <sup>9</sup> /L; NS).                                                 | ALC <2×10 <sup>9</sup> /L associated with higher FFS ( <i>P</i> = <b>0.04</b> ) and TFS ( <i>P</i> = <b>0.011</b> ). |
| Jain R <i>et al.</i> <sup>9</sup>           | 2019 (2012–2017)               | hATG or rATG  | 10 (8–11*)                 | 43  | NS (data not shown)                                                                                                 | NS in OS and FFS (data not shown).                                                                                   |
| Cabannes-Hamy A <i>et al.</i> <sup>10</sup> | 2018 (2000–2013)               | hATG or rATG  | 17 (3–65)                  | 84  | Odds ratio, 0.73 for continuous ALC ( <i>P</i> =0.17)                                                               | Lower ALC associated with lower relapse rate ( <i>P</i> = <b>0.011</b> ) and higher FFS ( <i>P</i> = <b>0.004</b> )  |
| Kulagin A <i>et al.</i> <sup>11</sup>       | 2013 (2005–2012)               | hATG or rATG  | 21 (1–65)                  | 125 | NS (data not shown)                                                                                                 |                                                                                                                      |
| Scheinberg P <i>et al.</i> <sup>12</sup>    | 2009 (1989–2005)               | hATG          | 31 (18–53*)                | 316 | ALC >1×10 <sup>9</sup> /L associated with higher OR 70% (139 of 200) vs 47% (55 of 116; <i>P</i> = <b>0.0054</b> ). | Higher ALC associated with higher OS ( <i>P</i> = <b>0.0013</b> ).                                                   |
| Zaimoku Y <i>et al.</i>                     | Present study (2012–2019)      | hATG + EPAG   | 32 (3–82)                  | 176 | Higher ALC in OR vs NR (median, 1.3 vs 1.0 ×10 <sup>9</sup> /L; <i>P</i> =0.079 [ <i>P</i> = <b>0.016</b> ‡]).      | Higher ALC in CR vs no CR ( <i>P</i> =0.065 [ <i>P</i> = <b>0.010</b> ‡]).                                           |
| Shin SH <i>et al.</i> <sup>13</sup>         | 2013 (2001–2010)               | hATG or rATG  | 36 (14–75)                 | 99  | Odds ratio, 0.81 ( <i>P</i> =0.60) for ALC >0.9×10 <sup>9</sup> /L.                                                 | ALC >0.9×10 <sup>9</sup> /L tended to associate with higher OS ( <i>P</i> =0.092).                                   |
| Chang MH <i>et al.</i> <sup>14</sup>        | 2010 (1994–2007)               | hATG or rATG  | 49 (15–78)                 | 62  | Odds ratio, 1.1 ( <i>P</i> =0.86) for ALC >0.9×10 <sup>9</sup> /L.                                                  | ALC >0.9×10 <sup>9</sup> /L associated with higher OS ( <i>P</i> = <b>0.008</b> ).                                   |
| Boddu P <i>et al.</i> <sup>15</sup>         | 2017 (2000–2016)               | hATG or rATG  | 49 (19–84)                 | 62  | Odds ratio, 12.3 ( <i>P</i> = <b>0.025</b> ) for log ALC in the multivariate analysis.                              | Higher ALC tended to associate with higher OS ( <i>P</i> =0.09)                                                      |
| Afable MG 2nd <i>et al.</i> <sup>16</sup>   | 2011 (1996–2010)               | hATG or rATG  | 52† (3–80)                 | 87  | ALC >0.75×10 <sup>9</sup> /L associate with higher OR ( <i>P</i> =0.070).                                           | ALC >0.75×10 <sup>9</sup> /L associated with higher OS in multivariate analysis ( <i>P</i> = <b>0.03</b> ).          |
| Vaht K <i>et al.</i> <sup>17</sup>          | 2018 (2000–2011)               | hATG or rATG  | 53 (2–85)                  | 157 | ALC >1.0×10 <sup>9</sup> /L showed higher OR 48% (58 of 121) vs 42% (15 of 36; <i>P</i> =0.51).                     |                                                                                                                      |

The blue and red cells indicate association of better outcomes with lower and higher ALC, respectively. ATG-F indicates Jurkat cell-reactive ATG; FFS, failure free survival; hATG, horse ATG; HR, hazard ratio; OS, overall survival; rATG, rabbit ATG; TFS, transplant free survival. The other abbreviations are explained in Table S1. \*IQR †Mean of median age in the two IST cohorts. ‡After exclusion of young children aged <10 years.

**Figure S1**

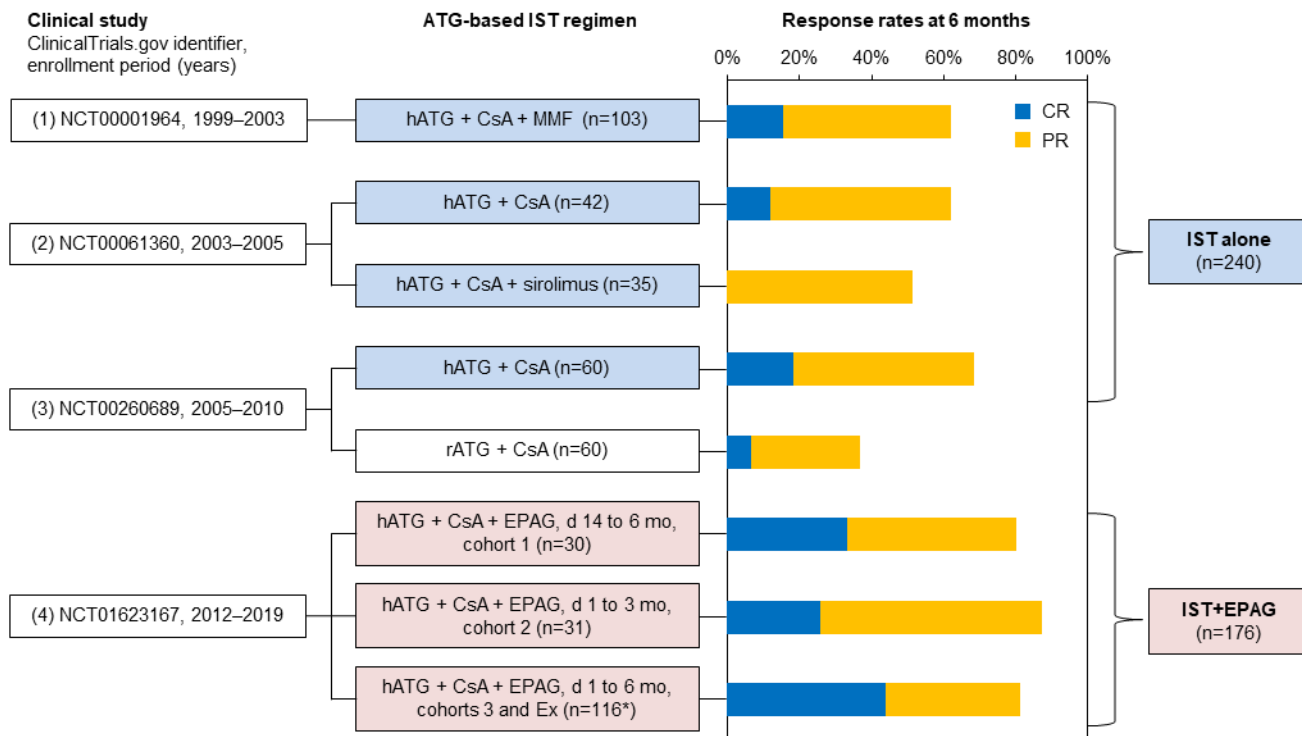

**Figure S1. IST protocols and responses.** Immunosuppressive therapy (IST) alone group included four horse antithymocyte globulin ATG (hATG)-based regimens from three clinical studies. IST plus eltrombopag (EPAG) group was consisted of four cohorts with three different administration duration of EPAG. CR indicates complete response; Ex, extension cohort; MMF, mycophenolate mofetil; PR, partial response; and rATG, rabbit ATG. \*One patient in Ex cohort who did not reach 3-month evaluation after a hematological response was excluded from the statistical analysis.

**Figure S2**

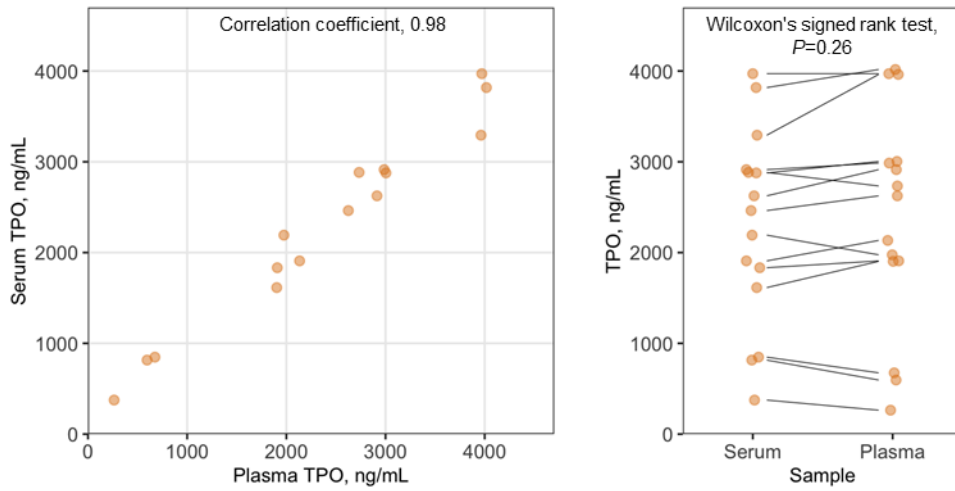

**Figure S2. TPO levels in plasma and serum.** Plasma and serum sampled at the same time contained almost equal levels of thrombopoietin (TPO) in 15 patients with immune aplastic anemia.

Figure S3

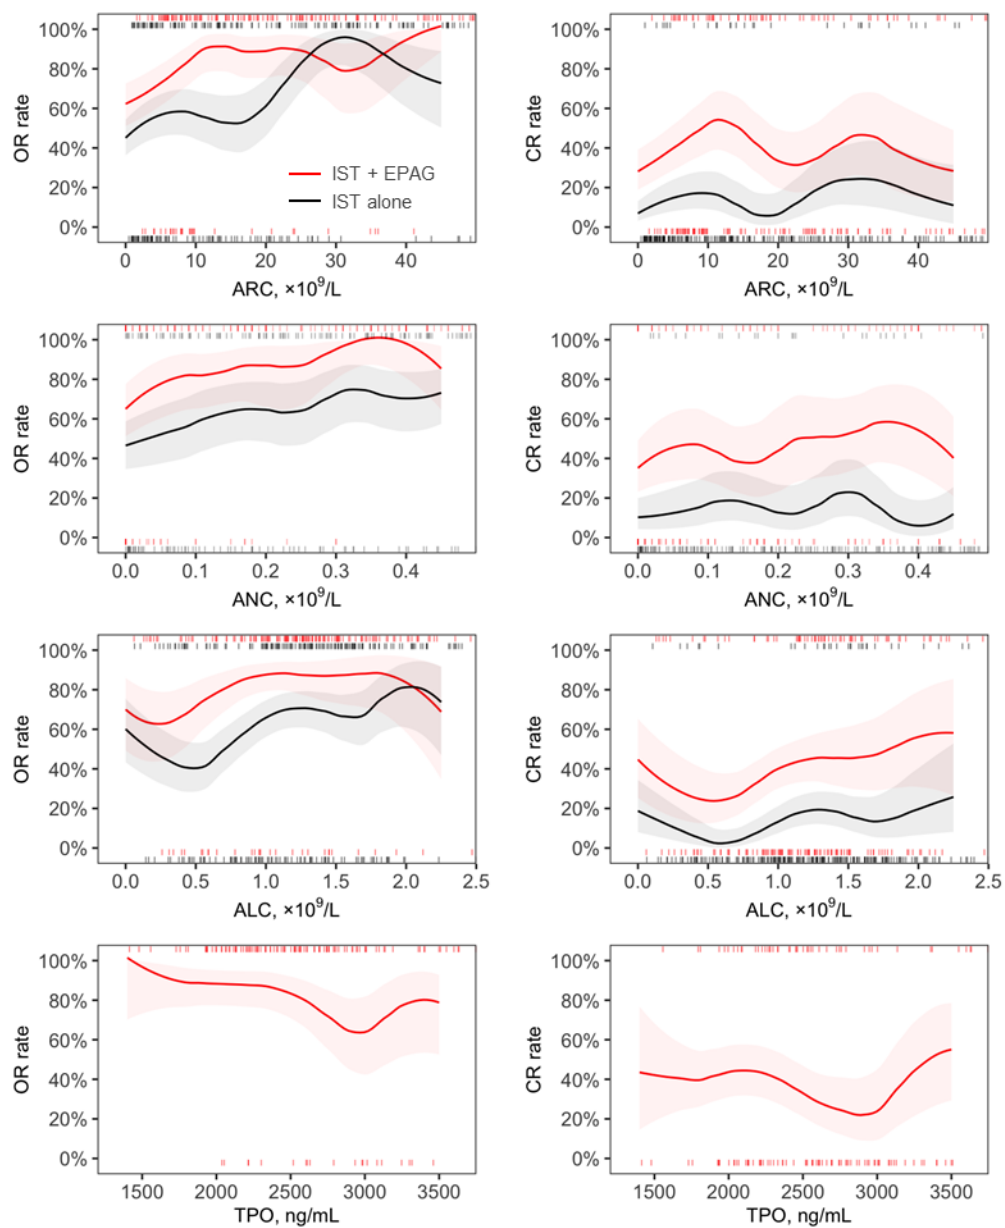

**Figure S3. Response curves according to initial blood counts.** Overall response (OR) rate and CR rate and their 90% confidence interval of individuals with initial blood counts between  $X$  and  $X + \alpha$  in groups of IST plus EPAG (red line) and IST alone (black line) were shown. Absolute reticulocyte count (ARC),  $\alpha = 10 \times 10^9/L$ ; absolute neutrophil count (ANC),  $\alpha = 0.1 \times 10^9/L$ ; absolute lymphocyte count (ALC),  $\alpha = 0.5 \times 10^9/L$ ; plasma thrombopoietin level (TPO),  $\alpha = 500 \text{ ng/mL}$ .

**Figure S4**

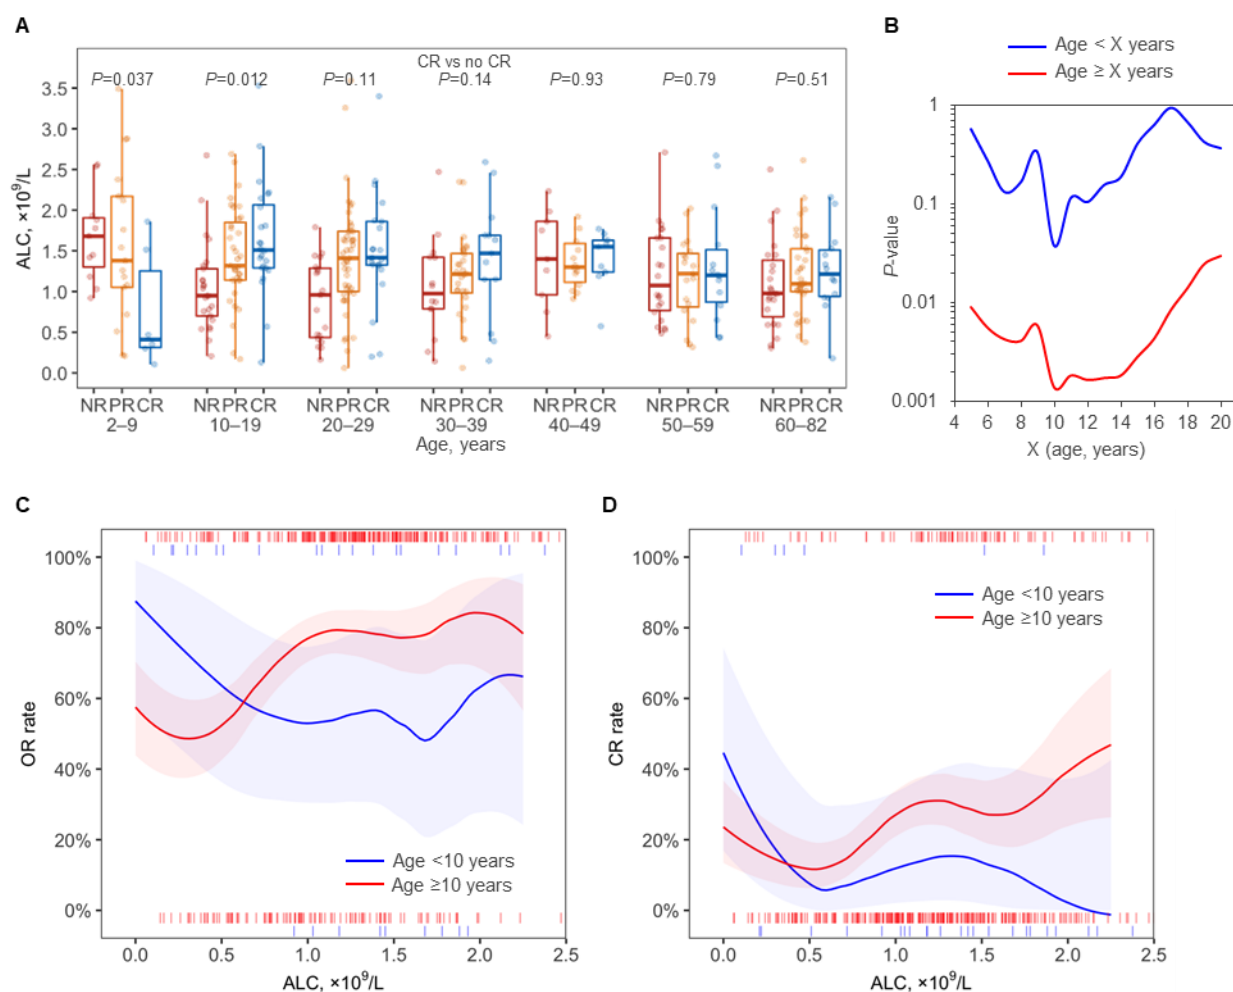

**Figure S4. Inverse correlation of ALC with complete response in young children.** (A) Pretreatment ALC and IST responses according to age-subgroups in the 416 patients treated with and without EPAG. Outlier for ALC  $> 4.0 \times 10^9/L$ , 1 in PR, aged 40 to 49 years. (B)  $P$ -values for the comparisons of ALC between CR and non-CR among patients younger than X years (blue line; lower ALC correlates with CR) and among those at or older than X years (red line; higher ALC correlates with CR). The age of 10 years was the best cut-off for both positive and negative correlations of ALC with CR. (C and D) OR and CR rates and their 90% confidence interval in individuals with initial ALC between X and  $(X + 1.0) \times 10^9/L$ , aged younger than 10 years (blue line) and those with initial ALC between X and  $(X + 0.5) \times 10^9/L$ , aged 10 years or older (red line).



Figure S5

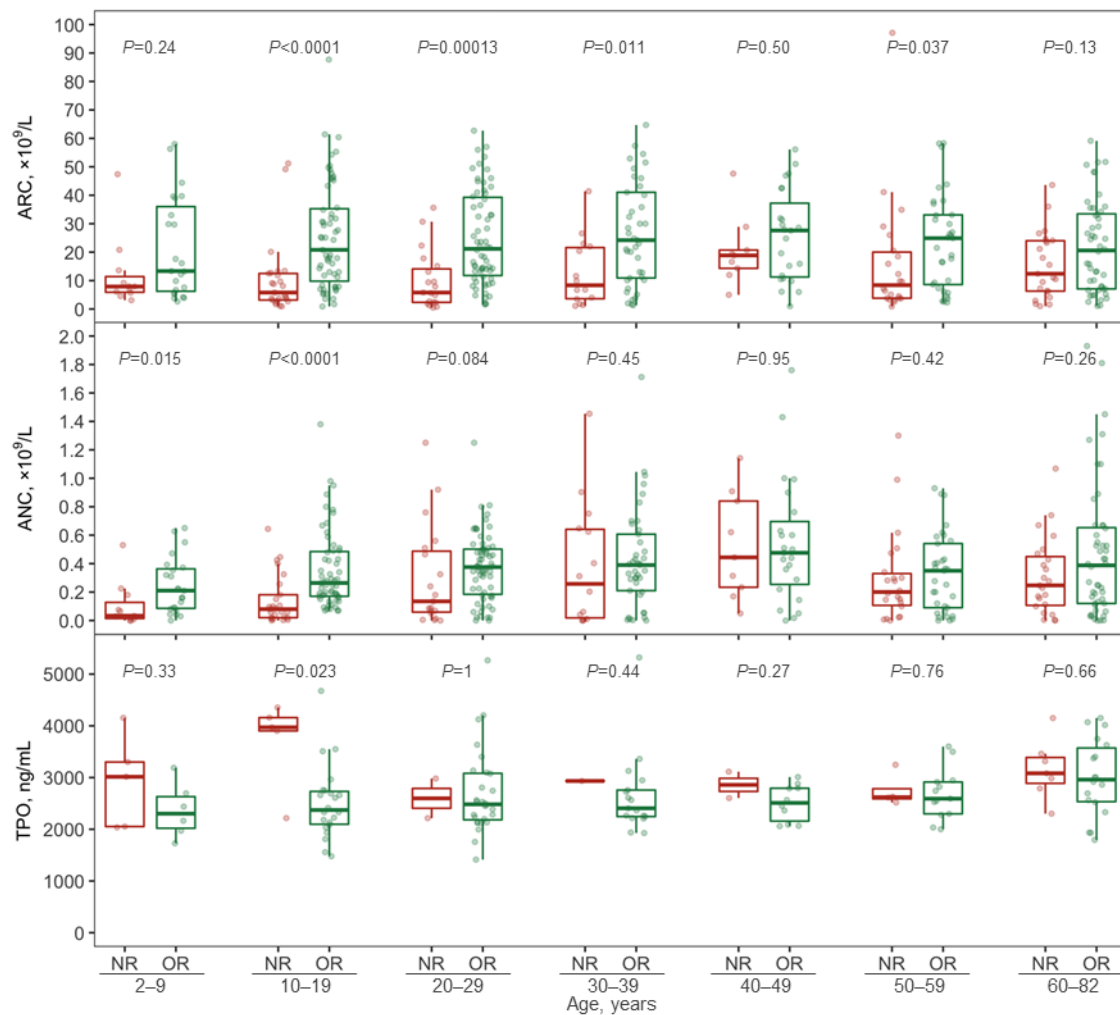

Figure S5. Age-subgroup and overall response. Pretreatment ARC (n=416; total patients), ANC (n=416; total patients) and TPO (n=140; IST+EPAG group) were compared between OR and NR according to age groups. Outlier for ARC  $> 100 \times 10^9/L$ , 2 in OR.

**Figure S6**

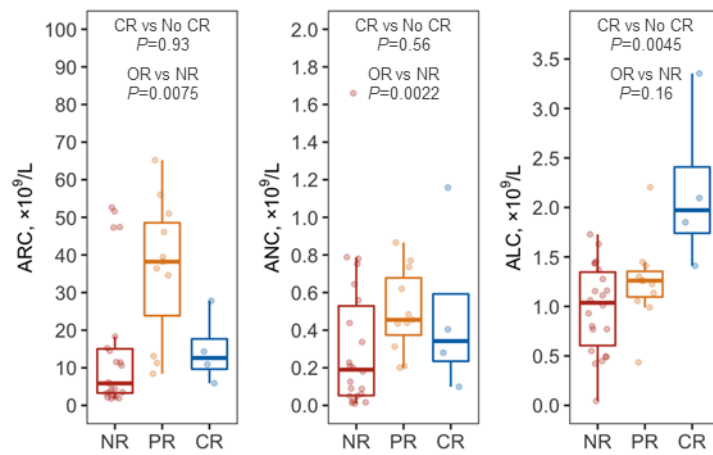

**Figure S6. Rabbit ATG-based IST.** Pretreatment ALC, ARC and ANC of 54 patients, aged 10 years or older (median, 27 years), initially treated with rabbit ATG and cyclosporine, were compared across hematological responses at 6 months.

## Supplementary references

1. Scheinberg P, Wu CO, Nunez O, Boss C, Sloand EM, Young NS. Treatment of severe aplastic anemia with a combination of horse antithymocyte globulin and cyclosporine, with or without sirolimus: a prospective randomized study. *Haematologica* 2009; 94(3): 348-54.
2. Scheinberg P, Nunez O, Weinstein B, Biancotto A, Wu CO, Young NS. Horse versus rabbit antithymocyte globulin in acquired aplastic anemia. *N Engl J Med* 2011; 365(5): 430-8.
3. Townsley DM, Scheinberg P, Winkler T, et al. Eltrombopag added to standard immunosuppression for aplastic anemia. *N Engl J Med* 2017; 376(16): 1540-50.
4. Scheinberg P, Nunez O, Wu C, Young NS. Treatment of severe aplastic anaemia with combined immunosuppression: anti-thymocyte globulin, ciclosporin and mycophenolate mofetil. *Br J Haematol* 2006; 133(6): 606-11.
5. Gu C, Zhu X, Qiao X, Zhai X, Shi W, Xie X. Multivariate logistic analysis of predictors of response to immunosuppressive therapy in children with aplastic anemia: a double-center study. *Hematology* 2019; 24(1): 282-9.
6. Yoshida N, Yagasaki H, Hama A, et al. Predicting response to immunosuppressive therapy in childhood aplastic anemia. *Haematologica*; 2011: 771-4.
7. Narita A, Muramatsu H, Sekiya Y, et al. Paroxysmal nocturnal hemoglobinuria and telomere length predicts response to immunosuppressive therapy in pediatric aplastic anemia. *Haematologica* 2015; 100(12): 1546-52.
8. Sakaguchi H, Nishio N, Hama A, et al. Peripheral blood lymphocyte telomere length as a predictor of response to immunosuppressive therapy in childhood aplastic anemia. *Haematologica* 2014; 99(8): 1312-6.
9. Jain R, Trehan A, Bansal D, Varma N. Aplastic anemia in children: How good is immunosuppressive therapy? *Pediatr Hematol Oncol* 2019; 36(4): 211-21.
10. Cabannes-Hamy A, Boissel N, Peffault De Latour R, et al. The effect of age in patients with acquired aplastic anaemia treated with immunosuppressive therapy: comparison of adolescents and young adults with children and older adults. *Br J Haematol* 2018; 183(5): 766-74.
11. Kulagin A, Lisukov I, Ivanova M, et al. Prognostic value of paroxysmal nocturnal haemoglobinuria clone presence in aplastic anaemia patients treated with combined immunosuppression: results of two-centre prospective study. *Br J Haematol* 2014; 164(4): 546-54.
12. Scheinberg P, Wu CO, Nunez O, Young NS. Predicting response to immunosuppressive therapy and survival in severe aplastic anaemia. *Br J Haematol* 2009; 144(2): 206-16.
13. Shin SH, Yoon JH, Yahng SA, et al. The efficacy of rabbit antithymocyte globulin with cyclosporine in comparison to horse antithymocyte globulin as a first-line treatment in adult patients with severe aplastic anemia: a single-center retrospective study. *Ann Hematol* 2013; 92(6): 817-24.
14. Chang MH, Kim KH, Kim HS, et al. Predictors of response to immunosuppressive therapy with antithymocyte globulin and cyclosporine and prognostic factors for survival in patients with severe aplastic anemia. *Eur J Haematol* 2010; 84(2): 154-9.
15. Boddu P, Garcia-Manero G, Ravandi F, et al. Clinical outcomes in adult patients with aplastic anemia: A single institution experience. *Am J Hematol* 2017; 92(12): 1295-302.
16. Afable MG, 2nd, Shaik M, Sugimoto Y, et al. Efficacy of rabbit anti-thymocyte globulin in severe aplastic anemia. *Haematologica* 2011; 96(9): 1269-75.
17. Vaht K, Goransson M, Carlson K, et al. Low response rate to ATG-based immunosuppressive therapy in very severe aplastic anaemia - A Swedish nationwide cohort study. *Eur J Haematol* 2018; 100(6): 613-20.
